# Supplementary material
Source: publisher figshare collection journal article supplement (https://acs.figshare.com/ndownloader/files/15802214)
Supplement: Supplementary file 1 [file 15802214]

## **Supporting Information for: Tailoring Organic-Organic Poly(vinylpyrrolidone) Microparticles and Fibers with Multi-Walled Carbon Nanotubes for Reinforced Composites**

Christian P. Narvaez-Muñoz,<sup>\*,†</sup> Luis M. Carrion-Matamoras,<sup>†</sup> Karla Vizuite,<sup>‡</sup> Alexis Debut,<sup>‡</sup>  
Carlos R. Arroyo,<sup>‡</sup> Víctor Guerrero,<sup>¶</sup> Cristina E. Almeida-Naranjo,<sup>¶</sup> Víctor Morales-Flórez,<sup>§</sup>  
Duncan J. Mowbray,<sup>||</sup> and Camilo Zamora-Ledezma<sup>\*,||,⊥</sup>

<sup>||</sup>School of Physical Sciences and Nanotechnology, Yachay Tech University, 100119-Urcuquí, Ecuador

<sup>†</sup>Laboratorio de Reología y Fluidos Complejos, Universidad de las Fuerzas Armadas (ESPE), Sangolquí, Ecuador

<sup>‡</sup>Centro de Nanociencia y Nanotecnología, Universidad de las Fuerzas Armadas (ESPE), Sangolquí, Ecuador

<sup>¶</sup>Escuela Politécnica Nacional, Departamento de Materiales, Quito, Ecuador

<sup>§</sup>Departamento de Física de la Materia Condensada, Universidad de Sevilla, Avenida Reina Mercedes, 41012 Seville, Spain

<sup>⊥</sup>Instituto Venezolano de Investigaciones Científicas (IVIC), Apartado 20632, Caracas 1020-A, Venezuela

\* [acpnarvaez1@espe.edu.ec](mailto:acpnarvaez1@espe.edu.ec) (C.P.N.-M.) [czamora@yachaytech.edu.ec](mailto:czamora@yachaytech.edu.ec) (C.Z.-L.)

### **XRD**

X-ray Diffraction analyses were performed in an XRD Bruker diffractometer D8I-90 by standard powder method (Cu-K $\alpha$  radiation,  $\lambda_{\alpha 1}=0.154$  nm), from 10.00° to 70.00° ( $\Delta(2\theta) = 0.015^\circ$ , counting time = 80 s)

### **SEM**

Scanning Electron Microscopy images were taken in a HITACHI S5200 using an acceleration voltage of 5 kV. No metallic coating was used. Nanotube widths were measured using ImageJ software: nanotube diameter =  $18 \pm 7$  nm. Typically, MWNT powder were poured onto a double face and conductive scotch, and imaged without further metallization.

### **TEM**

Transmission electron microscopy was performed in a Philips CM200 working at an acceleration voltage of 200 kV. In a typical procedure, MWNT powder was dispersed in ethanol, and subsequently a drop of the MWNT-ethanol dispersion was casted onto a TEM grids.

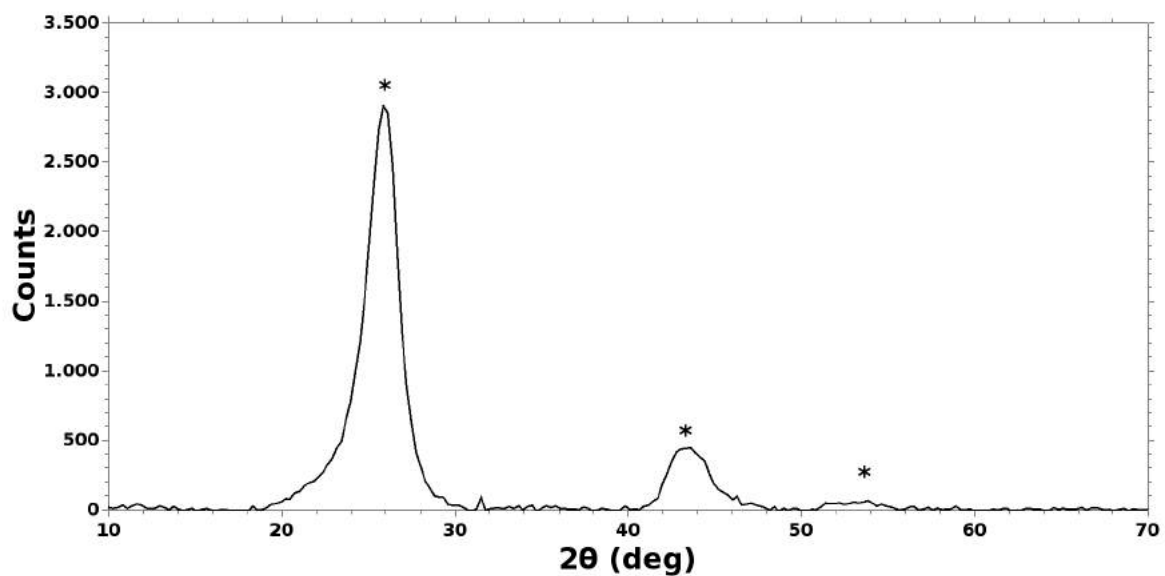

**Figure S1.** XRD pattern of as-received MWCNT where typical graphite pattern is remarked by the stars (Reference pattern: 0-001-0646 )

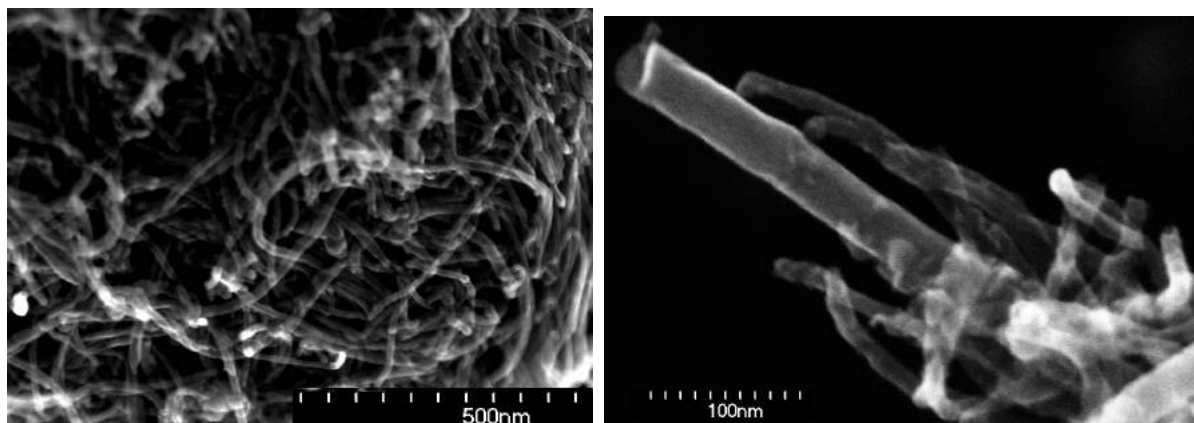

**Figure S2.** Typical SEM images of the as produced MWCNT powder, where the width of the tubes can be easily assessed. Besides, the open ends of the tubes can be also confirmed.

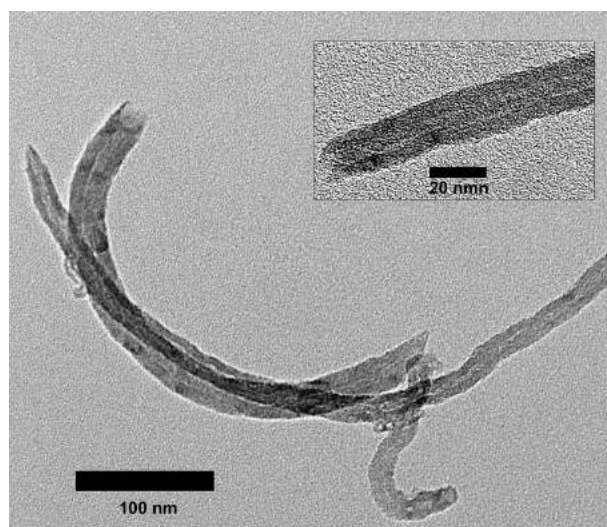

**Figure S3.** Typical TEM images of the as produced MWCNT reveal the width of the tubes, the open ends, and the thickness of the layered walls of the tubes.

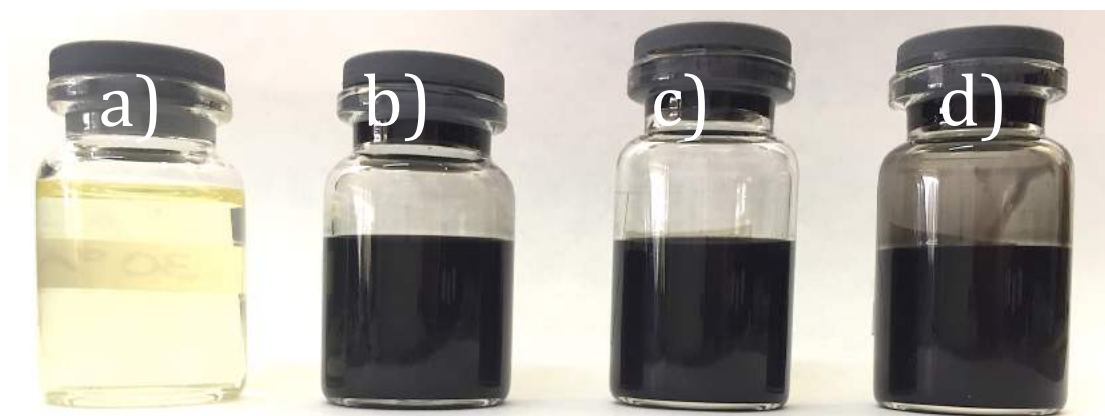

**Figure S4.** Macroscopic pictures of 7 ml vials: a) PVP/Ethanol 30 wt.%. (b-c) Functionalized Multi Walled Carbon Nanotubes (NanoAmor) suspensions in PVP/Ethanol at different content of nanotubes, b) 0.02 wt.%, c) 0.2 wt.% and d) 0.4 wt.%. PVP content was maintained constant at 30 wt.% in all samples.

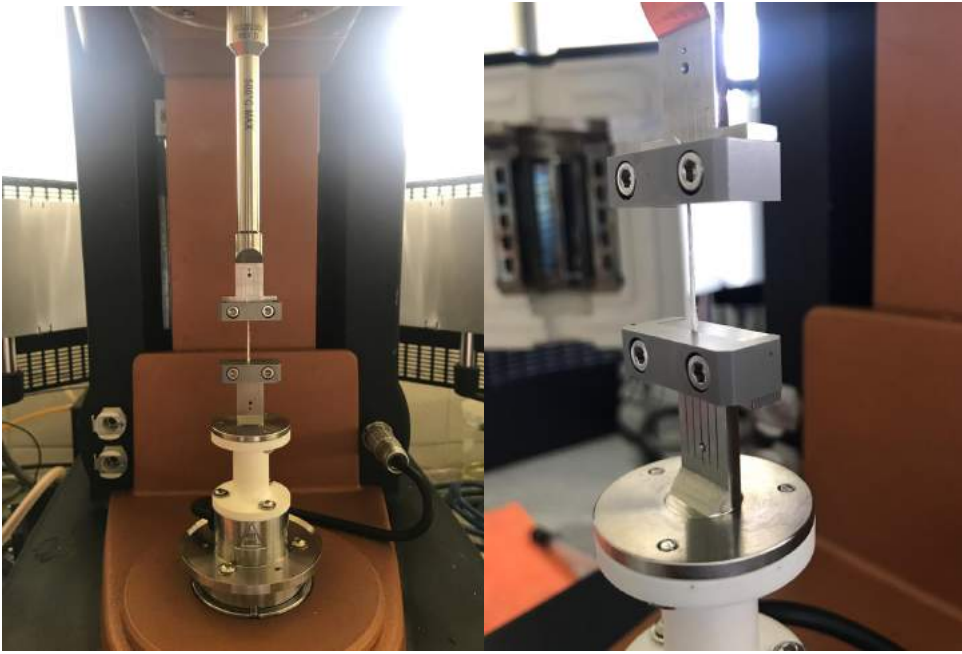

**Figure S5.** Show a photograph of this experimental set up for mechanical measurements. The specimens were tested as yarns of approximate diameter  $df = 900 \mu\text{m}$  and length  $L = 3 \text{ cm}$  by rolling flat fiber mats.

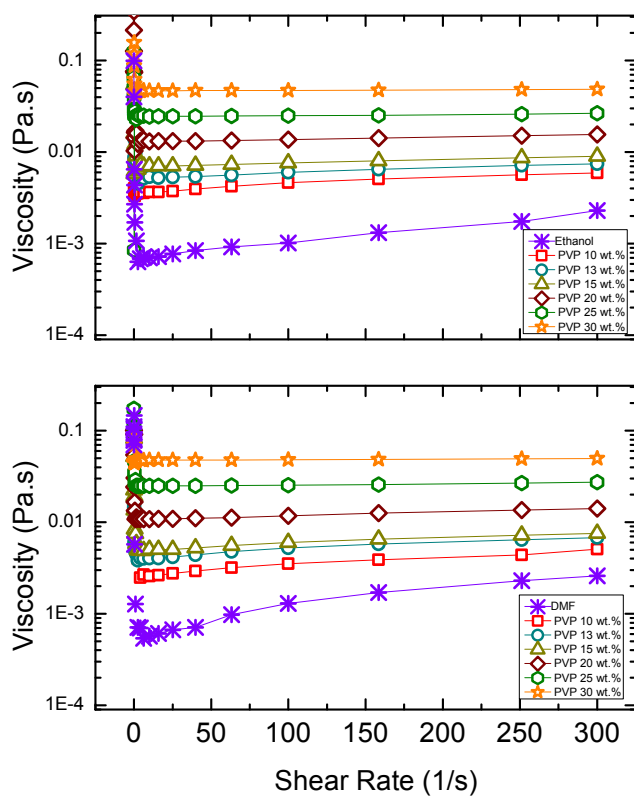

**Figure S6.** Viscosity vs Shear rate for PVP solutions for different content of PVP for shear rate from 0 to 300 (1/s)

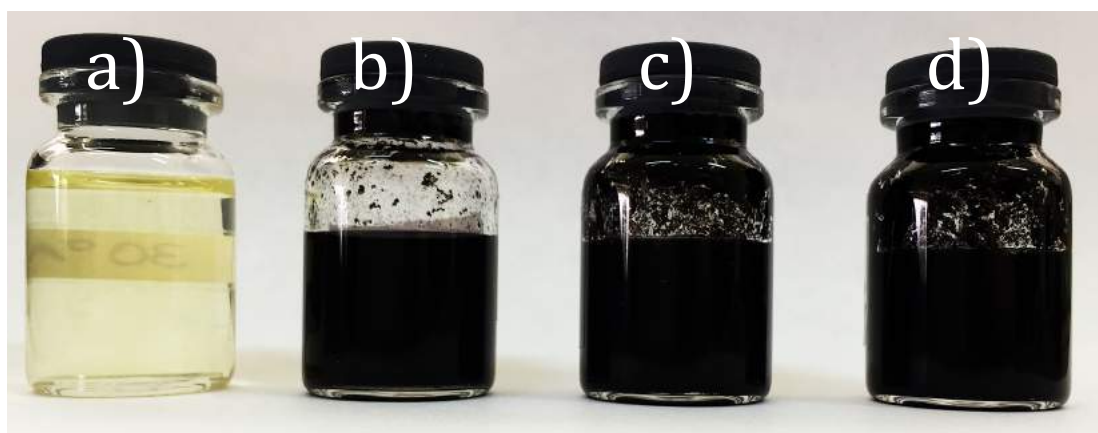

**Figure S7.** Macroscopic pictures of 7 ml vials: a) PVP/Ethanol 30 wt.%. (b-c) pristine Single Walled Carbon Nanotubes (Elicarb) suspension in PVP/Ethanol at different content of nanotubes, b) 0.02 wt.%, c) 0.1 wt.% and d) 0.2 wt.%. PVP content was maintained constant at 30 wt.% in all samples. Single walled Carbon nanotubes (SWNT) from Elicarb “Thomas Swan” (UK) with purity > 95%, average diameter = 2 nm, average BET specific surface area > 800 m<sup>2</sup>/g, metal oxide content: maximum of 5 wt.% and moisture content: maximum of 1 wt.% are presently used.

**Table S1.** Experimental parameters for microparticle and fiber preparation using dimethylformamide (DMF) as solvent

| <b>DMF</b> |                      |                  |                 |                 |                     |
|------------|----------------------|------------------|-----------------|-----------------|---------------------|
| Sample     | Flow Rate<br>(mL/hr) | Distance<br>(cm) | Voltage<br>(kV) | Humidity<br>(%) | Temperature<br>(°C) |
| PVP 10 %   | 0.1                  | 12               | 8.5             | 56              | 21.3                |
| PVP 13 %   | 0.1                  | 12               | 8.8             | 53              | 22.3                |
| PVP 15 %   | 0.1                  | 12               | 8.4             | 56              | 21.1                |
| PVP 20 %   | 0.1                  | 12               | 9.4             | 45              | 22.3                |
| PVP 25 %   | 0.1                  | 12               | 8.5             | 45              | 22.5                |
| PVP 30 %   | 0.1                  | 12               | 7.2             | 45              | 22.7                |

**Table S2.** Experimental parameters for microparticle and fiber preparation using ethanol (EtOH) as solvent

| <b>EtOH</b> |                      |                  |                 |                 |                     |
|-------------|----------------------|------------------|-----------------|-----------------|---------------------|
| Sample      | Flow Rate<br>(mL/hr) | Distance<br>(cm) | Voltage<br>(kV) | Humidity<br>(%) | Temperature<br>(°C) |
| PVP 10 %    | 0.1                  | 12               | 13.8            | 53              | 22.5                |
| PVP 13 %    | 0.1                  | 12               | 13.9            | 53              | 22.3                |
| PVP 15 %    | 0.1                  | 12               | 14.1            | 49              | 22.5                |
| PVP 20 %    | 0.1                  | 12               | 14.2            | 45              | 22.3                |
| PVP 25 %    | 0.1                  | 12               | 14.5            | 42              | 21.3                |
| PVP 30 %    | 0.1                  | 12               | 14.7            | 46              | 20.5                |
